# Supplementary material for: Metabolic Fluxes of Nitrogen and Pyrophosphate in Chemostat Cultures of Clostridium thermocellum and Thermoanaerobacterium saccharolyticum
Source: PubMed Central journal article supplement (PMC7657619; doi:10.1128/aem.01795-20), 2020-11-10
Supplement: AEM.01795-20-s0001.pdf [file AEM.01795-20-s0001.pdf]

## Supplemental Material.

**Table S1:** Cellular biomass and main fermentation products for chemostat cultivation of *Clostridium thermocellum* at increasing cellobiose concentrations at a dilution rate  $D=0.1 \text{ hr}^{-1}$ . N.D.: Not Detected.

| Component (mg/L)    | Cellobiose loading |              |              |              |
|---------------------|--------------------|--------------|--------------|--------------|
|                     | 1.25               | 2.5          | 3.75         | 5.0          |
| Cell carbon         | 88.2 ± 1.2         | 192.3 ± 10.4 | 263.1 ± 5.3  | 337.3 ± 2.2  |
| Cell nitrogen       | 26.4 ± 0.8         | 60.5 ± 3.3   | 78.9 ± 1.6   | 102.0 ± 1.2  |
| Acetate             | 269.3 ± 0.3        | 551.7 ± 0.5  | 791.9 ± 0.4  | 1062.4 ± 16  |
| Ethanol             | 96.7 ± 1.5         | 297.1 ± 2.4  | 502.9 ± 0.5  | 699.6 ± 22.2 |
| Formate             | 23.1 ± 0.5         | 79.5 ± 0.3   | 151.2 ± 1.0  | 241.8 ± 3.6  |
| Lactate             | 2.8 ± 0.4          | 19.2 ± 0.2   | 20.3 ± 0.4   | 35.3 ± 3.3   |
| Pyruvate            | 3.6 ± 0.2          | 12.1 ± 0.5   | 10.3 ± 0.0   | 15.4 ± 2.3   |
| Glucose             | 7.9 ± 0.5          | 13.0 ± 0.5   | 16.3 ± 0.2   | 20.2 ± 1.0   |
| Isobutanol          | 7.1 ± 0.3          | 17.2 ± 0.9   | 23.7 ± 0.8   | 25.3 ± 0.7   |
| Supernatant protein | 14.8 ± 1.3         | 22.8 ± 6.7   | 56.6 ± 8.1   | 103.5 ± 5.7  |
| Cellobiose in feed  | 1265.9 ± 145.4     | 2423.6 ± 7.8 | 3702.3 ± 5.4 | 4757.2 ± 8.0 |
| Residual cellobiose | N.D.               | N.D.         | N.D.         | N.D.         |

**Table S2:** Cellular carbon, nitrogen and fermentation products (mg/L) of strain LL1639 in which the membrane-bound pyrophosphatase gene was deleted ( $\Delta$ hpt  $\Delta$  PPI-ase) as compared to strain LL1299 ( $\Delta$ hpt) from which it was derived. For further information about strains, see Materials and Methods section. N.D.: Not Detected.

| Component (mg/L)    | LL1299<br><i>DSM1313 <math>\Delta</math>hpt</i> | LL1639<br><i>DSM1313 <math>\Delta</math>hpt<br/><math>\Delta</math> PPI-ase</i> |
|---------------------|-------------------------------------------------|---------------------------------------------------------------------------------|
| Cell nitrogen       | 93.3 $\pm$ 2.6                                  | 94.0 $\pm$ 1.7                                                                  |
| Cell carbon         | 329.3 $\pm$ 6.8                                 | 331.7 $\pm$ 6.9                                                                 |
| Acetate             | 1033.5 $\pm$ 24.3                               | 1060.5 $\pm$ 6.1                                                                |
| Ethanol             | 652.1 $\pm$ 15.0                                | 634.3 $\pm$ 17.7                                                                |
| Lactate             | 36.1 $\pm$ 4.0                                  | 32.2 $\pm$ 7.0                                                                  |
| Formate             | 246.6 $\pm$ 21.9                                | 253.7 $\pm$ 7.9                                                                 |
| Glucose             | 19.7 $\pm$ 5.6                                  | 23.5 $\pm$ 7.2                                                                  |
| Pyruvate            | 21.2 $\pm$ 6.8                                  | 22.4 $\pm$ 6.2                                                                  |
| Isobutanol          | 35.8 $\pm$ 1.1                                  | 30.1 $\pm$ 3.9                                                                  |
| CO <sub>2</sub>     | 1194.8                                          | 1184.2                                                                          |
| Cellobiose in feed  | 4833.4 $\pm$ 33.1                               | 4822.5 $\pm$ 30.0                                                               |
| Residual cellobiose | N.D.                                            | N.D.                                                                            |
| Carbon recovery (%) | 75.5                                            | 75.6                                                                            |

**Table S3:** Physiology of *C. thermocellum* in chemostat cultures at  $D = 0.1 \text{ hr}^{-1}$  grown with a fixed cellobiose concentration of 5 g/L and urea concentrations between 2.0 and 0.02 g/L, the corresponding C/N ratio in the medium is presented between brackets. Concentrations of all compounds are presented as mg/L. CO<sub>2</sub> was calculated from the sum of acetate, ethanol, and twice the amount of isobutanol minus the amount of formate. N.D.: Not Detected.

| <i>Urea in feed (g/L) and carbon to nitrogen ration in the medium.</i> |                |                |                |                |                |                |                |                 |
|------------------------------------------------------------------------|----------------|----------------|----------------|----------------|----------------|----------------|----------------|-----------------|
| Component                                                              | 2.0<br>(2.0)   | 0.5<br>(8.7)   | 0.35<br>(12.6) | 0.2<br>(22.4)  | 0.15<br>(30.1) | 0.10<br>(41.9) | 0.05<br>(94.3) | 0.02<br>(231.3) |
| Cell carbon                                                            | 349.8 ± 20.2   | 342.5 ± 16.5   | 334 ± 1.3      | 235.4 ± 23.4   | 183.3 ± 11.1   | 134.2 ± 1.9    | 80.1 ± 1.7     | 43.7 ± 0.3      |
| Cell nitrogen                                                          | 102.6 ± 3.2    | 98.7 ± 4.7     | 95.8 ± 0.2     | 59.4 ± 7.2     | 40.4 ± 0.2     | 30.2 ± 0.8     | 15.9 ± 0.2     | 6.8 ± 0.7       |
| Acetate                                                                | 1346.4 ± 27.2  | 1242.1 ± 17.5  | 1236.3 ± 20.5  | 1189.1 ± 217.7 | 736.3 ± 57.3   | 491.1 ± 58.1   | 217.3 ± 15.3   | 100.9 ± 6.5     |
| Ethanol                                                                | 482.5 ± 25.0   | 507.9 ± 27.8   | 525.5 ± 1.5    | 443.3 ± 35.9   | 304.3 ± 25.8   | 204.6 ± 44.0   | 73.3 ± 4.2     | 44.7 ± 12.4     |
| Lactate                                                                | 59.2 ± 15.1    | 49.4 ± 10.2    | 65.3 ± 9.5     | 110.1 ± 48.2   | 120.9 ± 17.6   | 105.1 ± 18.5   | 33.8 ± 13.4    | 21.9 ± 1.0      |
| Formate                                                                | 362.7 ± 26.7   | 312.0 ± 37.8   | 333.5 ± 6.3    | 388.8 ± 156.2  | 148.2 ± 19.5   | 97.1 ± 74.5    | 16.4 ± 23.0    | 13.5 ± 5.1      |
| Glucose                                                                | 22.9 ± 14.6    | 30.3 ± 14.6    | 24.2 ± 1.4     | 54.9 ± 3.8     | 85.1 ± 57.1    | 138.0 ± 95.9   | 152.5 ± 149.6  | 56.1 ± 9.4      |
| Pyruvate                                                               | 13.4 ± 1.7     | 17.7 ± 3.3     | 24.5 ± 3.7     | 275.2 ± 162.4  | 304.5 ± 73.2   | 183.6 ± 122.7  | 94.7 ± 31.3    | 41.8 ± 6.8      |
| Isobutanol                                                             | 15.9 ± 1.3     | 11.8 ± 0.9     | 10.8 ± 0.8     | 22.6 ± 9.9     | 19.0 ± 2.2     | 9.7 ± 3.5      | N.D.           | N.D.            |
| Excreted amino acids                                                   | 87.7 ± 9.9     | 72 ± 9.2       | 71.3 ± 4.1     | 234.1 ± 101.2  | 234.1 ± 48.2   | 152.9 ± 29.1   | 78.4 ± 17.6    | 24.5 ± 5.2      |
| Supernatant protein                                                    | 90.8 ± 6.8     | 96.9 ± 5.6     | 115.7 ± 26     | 36.5 ± 2.3     | 24.3 ± 3.1     | 33.4 ± 6.4     | 33.7 ± 6.5     | 17.2 ± 2.3      |
| CO <sub>2</sub>                                                        | 1119.6         | 1111.2         | 1102.0         | 950.0          | 711.1          | 474.0          | 213.5          | 103.8           |
| Cellobiose in feed                                                     | 4658.0 ± 123.6 | 4846.0 ± 106.2 | 4841.7 ± 21.2  | 4908.8 ± 196.8 | 4950.3 ± 63.4  | 4839.7 ± 104.2 | 4842.4 ± 122.9 | 4830.5 ± 166.8  |
| Residual cellobiose                                                    | N.D.           | N.D.           | N.D.           | 45.3 ± 24.4    | 1185.2 ± 242.8 | 2010.7 ± 324.6 | 3303.7 ± 105.7 | 3878.1 ± 52.5   |
| Urea in feed                                                           | 2057.0 ± 5.4   | 504.7 ± 7.6    | 347.1 ± 1.5    | 198.2 ± 5.5    | 148.4 ± 1      | 104.2 ± 3.2    | 46.3 ± 6.3     | 18.9 ± 1.8      |
| Residual urea                                                          | 868.0 ± 296.0  | N.D.           | N.D.           | N.D.           | N.D.           | N.D.           | N.D.           | N.D.            |
| Residual ammonia                                                       | 494.5 ± 201.8  | 108.8 ± 7.6    | N.D.           | N.D.           | N.D.           | N.D.           | N.D.           | N.D.            |

**Table S4:** Nitrogen balance for chemostat cultures of *C. thermocellum* growing at a fixed cellobiose concentration of 5 g/L and urea concentrations between 2.0 and 0.02 g/L, corresponding C/N ratio in medium is presented between brackets. Nitrogen in protein was derived from 0.161 mg N/mg protein. N.D.: Not Detected.

| Component in mg N/L    | <i>Urea in feed (g/L) and C/N ratio in medium</i> |                     |                       |                      |                       |                       |                       |                        |
|------------------------|---------------------------------------------------|---------------------|-----------------------|----------------------|-----------------------|-----------------------|-----------------------|------------------------|
|                        | <i>2.0</i><br>(2.0)                               | <i>0.5</i><br>(8.7) | <i>0.35</i><br>(12.6) | <i>0.2</i><br>(22.4) | <i>0.15</i><br>(30.1) | <i>0.10</i><br>(41.9) | <i>0.05</i><br>(94.3) | <i>0.02</i><br>(231.3) |
| Urea                   | 404.9 ± 138.1                                     | N.D.                | N.D.                  | N.D.                 | N.D.                  | N.D.                  | N.D.                  | N.D.                   |
| Ammonium               | 406.7 ± 165.9                                     | 89.5 ± 6.2          | N.D.                  | N.D.                 | N.D.                  | N.D.                  | N.D.                  | N.D.                   |
| Biomass nitrogen       | 102.6 ± 3.2                                       | 98.7 ± 4.7          | 95.8 ± 0.2            | 59.4 ± 7.2           | 40.4 ± 0.2            | 30.2 ± 0.8            | 15.9 ± 0.2            | 6.8 ± 0.7              |
| Supernatant protein    | 14.6 ± 1.1                                        | 15.6 ± 0.9          | 18.6 ± 4.2            | 5.9 ± 0.4            | 3.9 ± 0.5             | 5.4 ± 1.0             | 5.4 ± 1.0             | 2.8 ± 0.4              |
| Amino acids            | 19.2 ± 5.3                                        | 15.3 ± 2.2          | 14.3 ± 1.3            | 38.3 ± 18.4          | 36.4 ± 9.5            | 25.3 ± 10.8           | 12.6 ± 3.8            | 3.8 ± 1.8              |
| Urea nitrogen in feed  | 959.5 ± 2.5                                       | 235.4 ± 3.5         | 161.9 ± 0.7           | 92.5 ± 2.6           | 69.2 ± 0.5            | 48.6 ± 1.5            | 21.6 ± 2.9            | 8.8 ± 0.9              |
| Nitrogen recovery (%)* | 98.8                                              | 93.1                | 79.5                  | 112.0                | 116.6                 | 125.2                 | 156.8                 | 151.3                  |

\*Values exceeding 100% may have been due to utilization of cysteine as an additional nitrogen source. Cysteine is present in the medium as a reducing agent (see Materials and Methods).

**Table S5:** Concentrations of amino acids (mg/L) in chemostat cultures of *C. thermocellum* grown at  $D = 0.1 \text{ hr}^{-1}$  grown with a fixed cellobiose concentration of 5 g/L and urea concentrations between 2.0 and 0.02 g/L, the corresponding C/N ratio in the medium is reported between brackets. N.D.: Not Detected.

| Amino acid (mg/L)       | Urea in feed (g/L) and C/N ratio in medium |                   |                   |                      |                     |                     |                    |                   |
|-------------------------|--------------------------------------------|-------------------|-------------------|----------------------|---------------------|---------------------|--------------------|-------------------|
|                         | 2.0<br>(2.0)                               | 0.5<br>(8.7)      | 0.35<br>(12.6)    | 0.2<br>(22.4)        | 0.15<br>(30.1)      | 0.10<br>(41.9)      | 0.05<br>(94.3)     | 0.02<br>(231.3)   |
| Alanine                 | 7.1 ± 4.4                                  | 11.4 ± 3.3        | 5.5 ± 1.5         | 8.9 ± 3.6            | 9.3 ± 3.0           | 7.6 ± 3.8           | 3.1 ± 2.3          | 0.8 ± 0.0         |
| Arginine                | N.D.                                       | 0.1 ± 0.1         | N.D.              | N.D.                 | N.D.                | N.D.                | N.D.               | N.D.              |
| Asparagine              | 1.4 ± 0.5                                  | 1.3 ± 1.0         | 1.7 ± 0.3         | 0.1 ± 0.1            | N.D.                | N.D.                | N.D.               | N.D.              |
| Aspartic acid           | 1.7 ± 0.3                                  | 1.0 ± 0.2         | 0.9 ± 0.1         | 0.7 ± 0.5            | 0.3 ± 0.1           | 0.2 ± 0.3           | 0.1 ± 0.0          | 0.1 ± 0.0         |
| Glutamic acid           | 26.8 ± 3.8                                 | 20.9 ± 1.1        | 18.4 ± 1.2        | 37.7 ± 10.4          | 31.5 ± 5.2          | 26.4 ± 18.2         | 12.6 ± 5.6         | 3.7 ± 1.0         |
| Glutamine               | 5.8 ± 6.5                                  | 1.5 ± 0.6         | 1.1 ± 0.2         | 0.7 ± 0.7            | N.D.                | N.D.                | N.D.               | N.D.              |
| Histidine               | N.D.                                       | N.D.              | N.D.              | 0.2 ± 0.2            | N.D.                | N.D.                | N.D.               | N.D.              |
| Isoleucine              | 6.0 ± 0.4                                  | 5.2 ± 1.0         | 6.1 ± 0.7         | 24.7 ± 13.4          | 29.1 ± 10.4         | 17.1 ± 0.2          | 11.4 ± 1.7         | 3.3 ± 0.6         |
| Leucine                 | 6.4 ± 1.1                                  | 3.8 ± 0.7         | 4.1 ± 0.5         | 6.5 ± 0.3            | 7.1 ± 0.4           | 6.6 ± 1.5           | 3.5 ± 0.3          | 1.8 ± 0.0         |
| Lysine                  | 4.7 ± 2.8                                  | 1.2 ± 1.0         | 2.6 ± 0.7         | 0.1 ± 0.0            | 0.1 ± 0.1           | N.D.                | N.D.               | N.D.              |
| Methionine              | 0.1 ± 0.1                                  | 0.1 ± 0.1         | 0.1 ± 0.0         | 0.9 ± 1.2            | 4.0 ± 2.0           | 4.9 ± 6.7           | 1.4 ± 1.5          | 0.2 ± 0.0         |
| Phenylalanine           | 1.8 ± 1.3                                  | 1.7 ± 0.3         | 1.8 ± 0.1         | 16.9 ± 2.6           | 13.5 ± 3.6          | 12.4 ± 7.2          | 9.0 ± 0.1          | 6.1 ± 0.6         |
| Proline                 | 4.1 ± 0.5                                  | 3.9 ± 0.4         | 3.7 ± 0.5         | 4.7 ± 0.9            | 6.0 ± 0.0           | 4.4 ± 1.7           | 2.2 ± 0.7          | 0.5 ± 0.0         |
| Serine                  | 4.2 ± 0.4                                  | 4.5 ± 0.6         | 5.5 ± 0.3         | 3.6 ± 1.4            | 2.2 ± 0.1           | 1.8 ± 0.3           | 0.7 ± 0.1          | 0.2 ± 0.2         |
| Threonine               | 4.1 ± 0.4                                  | 4.0 ± 0.6         | 3.9 ± 0.1         | 4.3 ± 1.4            | 2.8 ± 0.3           | 2.0 ± 1.4           | 1.2 ± 0.4          | 0.2 ± 0.1         |
| Tryptophan              | 0.8 ± 0.2                                  | 0.7 ± 0.3         | 0.8 ± 0.0         | 0.3 ± 0.1            | 0.2 ± 0.0           | 0.2 ± 0.0           | 0.1 ± 0.0          | N.D.              |
| Tyrosine                | 2.7 ± 5.6                                  | 1.2 ± 0.3         | 1.5 ± 0.1         | 3.4 ± 0.6            | 3.0 ± 0.4           | 2.7 ± 1.0           | 1.4 ± 0.2          | 0.9 ± 0.2         |
| Valine                  | 9.9 ± 1.3                                  | 9.5 ± 1.7         | 13.4 ± 0.1        | 120.4 ± 91.8         | 125.0 ± 43.0        | 66.6 ± 6.7          | 31.7 ± 4.7         | 7.2 ± 3.5         |
| <b>Total (mg/L)</b>     | <b>87.7 ± 9.9</b>                          | <b>72.0 ± 9.2</b> | <b>71.3 ± 4.1</b> | <b>234.1 ± 101.2</b> | <b>234.1 ± 48.2</b> | <b>152.9 ± 29.1</b> | <b>78.4 ± 17.6</b> | <b>24.5 ± 5.2</b> |
| Total carbon (mg C/L)   | 38.3 ± 12.1                                | 32.1 ± 5.8        | 32.6 ± 2.9        | 117.4 ± 64.7         | 118.0 ± 35.0        | 76.6 ± 23.0         | 40.0 ± 8.2         | 13.4 ± 5.2        |
| Total nitrogen (mg N/L) | 19.2 ± 5.3                                 | 15.3 ± 2.2        | 14.3 ± 1.3        | 38.3 ± 18.4          | 36.4 ± 9.5          | 25.3 ± 10.8         | 12.6 ± 3.8         | 3.8 ± 1.8         |

**Table S6:** Carbon balance over steady states with urea feed concentrations between 2.0 and 0.02 g/L and 5 g/L cellobiose for *Clostridium thermocellum* at a dilution rate  $D=0.1 \text{ hr}^{-1}$ . The corresponding C/N ratio in the medium is reported between brackets. N.D.: Not Detected.

| Component (mg C/L)   | Urea in feed (g/L and (C/N ration in medium)) |               |                |               |                |                |                |                 |
|----------------------|-----------------------------------------------|---------------|----------------|---------------|----------------|----------------|----------------|-----------------|
|                      | 2.0<br>(2.0)                                  | 0.5<br>(8.7)  | 0.35<br>(12.6) | 0.2<br>(22.4) | 0.15<br>(30.1) | 0.10<br>(41.9) | 0.05<br>(94.3) | 0.02<br>(231.3) |
| Cell carbon          | 349.8 ± 20.2                                  | 342.5 ± 16.5  | 334.0 ± 1.3    | 235.4 ± 23.4  | 183.3 ± 11.1   | 134.2 ± 1.9    | 80.1 ± 1.7     | 43.7 ± 0.3      |
| Acetate              | 538.6 ± 10.9                                  | 496.9 ± 7.0   | 494.6 ± 8.2    | 475.7 ± 87.1  | 294.5 ± 22.9   | 196.5 ± 23.2   | 86.9 ± 6.1     | 40.4 ± 2.6      |
| Ethanol              | 251.6 ± 13.0                                  | 264.9 ± 14.5  | 274.0 ± 0.8    | 231.2 ± 18.7  | 158.7 ± 13.4   | 106.7 ± 22.9   | 38.2 ± 2.2     | 23.3 ± 6.4      |
| Lactate              | 23.7 ± 6.0                                    | 19.8 ± 4.1    | 26.1 ± 3.8     | 44.1 ± 19.3   | 48.4 ± 7       | 42.0 ± 7.4     | 13.5 ± 5.4     | 8.7 ± 0.4       |
| Formate              | 94.7 ± 7.0                                    | 81.4 ± 9.9    | 87.0 ± 1.6     | 101.5 ± 40.8  | 38.7 ± 5.1     | 25.3 ± 19.4    | 4.3 ± 6.0      | 3.5 ± 1.3       |
| Glucose              | 9.2 ± 5.8                                     | 12.1 ± 5.8    | 9.7 ± 0.5      | 21.9 ± 24.4   | 34.1 ± 22.8    | 55.2 ± 38.4    | 61.0 ± 59.8    | 22.5 ± 3.8      |
| Pyruvate             | 5.5 ± 0.7                                     | 7.2 ± 1.4     | 10.0 ± 1.5     | 112.6 ± 66.4  | 124.6 ± 29.9   | 75.1 ± 50.2    | 38.7 ± 12.8    | 17.1 ± 2.8      |
| Isobutanol           | 10.3 ± 0.9                                    | 7.6 ± 0.6     | 7.0 ± 0.5      | 14.6 ± 6.4    | 12.3 ± 1.4     | 6.3 ± 2.3      | N.D.           | N.D.            |
| Excreted amino acids | 38.3 ± 12.1                                   | 32.1 ± 5.8    | 32.6 ± 2.9     | 117.4 ± 64.7  | 118.0 ± 35     | 76.6 ± 23.0    | 40.0 ± 8.2     | 13.4 ± 5.2      |
| Supernatant protein* | 48.3 ± 3.6                                    | 51.6 ± 3.0    | 61.6 ± 13.8    | 19.4 ± 1.2    | 12.9 ± 1.7     | 17.8 ± 3.4     | 17.9 ± 3.4     | 9.2 ± 1.2       |
| CO <sub>2</sub> **   | 305.6                                         | 303.3         | 300.8          | 259.3         | 194.1          | 129.4          | 58.3           | 28.3            |
| Cellobiose in feed   | 1961.5 ± 52.0                                 | 2040.6 ± 44.7 | 2038.8 ± 8.9   | 2067.1 ± 82.9 | 2084.5 ± 26.7  | 2038.0 ± 43.9  | 2039.1 ± 51.7  | 2034.1 ± 70.2   |
| Residual cellobiose  | N.D.                                          | N.D.          | N.D.           | 19.1 ± 10.3   | 499.1 ± 102.2  | 846.7 ± 136.7  | 1391.2 ± 44.5  | 1633.0 ± 22.1   |
| Carbon recovery (%)  | 85.4                                          | 79.4          | 80.3           | 79.9          | 82.4           | 84.0           | 89.8           | 90.6            |

\* 0.532 gC/gProtein

\*\* CO<sub>2</sub> is based on the amount of acetate, ethanol and twice the isobutanol minus the amount of formate produced.

DSM 1313 1 MIQITT-----QTIQIVAIISLIS  
 ATCC 27405 1 MIQITT-----QTIQIVAIISLIS  
 DSM 5807 1 MDI-----STALILAIVVSLIS  
 ATCC 35319 1 MYLQHRQLRKNVLRVLLISLLMGFFVPLSAFAGEADLKTPLSSTQNSILYIGMLICLLG  
 DSM 19732 1 -----  
 DSM 8532 1 MNQ-----TFELFSVVIATAAA  
 JCM 21531 1 -----  
 DSM 8691 1 MNS-----YLIITYGVVI-TAA

DSM 1313 21 LGVAANLYSWVKSQPSSNARIAEIGGYIQQGANTFLRREYLLARFTATAAVLILIFLPH  
 ATCC 27405 21 LGVAANLYSWVKSQPSSNARIAEIGGYIQQGANTFLRREYLLARFTATAAVLILIFLPH  
 DSM 5807 18 FGVAAWFYIWKVKSQPSSNKTVMVGLIQKGAFTFLREYALLARFAGVIATLILIFLPH  
 ATCC 35319 61 MLCVVEQFLKIKK-IAAHKSMLDVADTIYQTCRTFLVQQGKFLGLLLVFIGVCIAFYFGF  
 DSM 19732 1 -----  
 DSM 8532 18 FFAAWLYQWVKVKSQPSSNKKIAEVGGLIRSGAATFLKKEYTVLARFACVVAILILIFLPH  
 JCM 21531 1 -----  
 DSM 8691 17 LAITGFI-RFIFSDKGDEKMQQSDSIRKEGAMAFINRQYKTIIVLALIVAVIITIAN--

DSM 1313 81 --PIWSGNITQNIW-----MAVSYIFGTVLSALAGKIGIQIATIANIKSAEAAQKGV  
 ATCC 27405 81 --PIWSGNITQNIW-----MAVSYIFGTVLSALAGKIGIQIATIANIKSAEAAQKGV  
 DSM 5807 78 --PIWSGDFKDNIA-----MAVSYIFGTALSALAGKIGITATIANMKAAEAAQKGI  
 ATCC 35319 120 LQDKGAGGVFLIIF-----FTVMGILG---SYSVAWYGIRNNTANSRMAFSSLER-  
 DSM 19732 1 -----TKAAEAATKGV  
 DSM 8532 78 --PIWQGNAAENIT-----MAVAYIAGTALSALAGKIGIEVATIANVKSAAEAQKGI  
 JCM 21531 1 -----  
 DSM 8691 74 ----YYGHQSEGVSIAISYAWHVGIAFISGALCSAISGYIGMYMAVNSNVRAASGARKGL

DSM 1313 131 KP--AFMTGFRGGAVMGMAVVGTSLLGVTLVLLIVGD--A-----SAVLGFSF  
 ATCC 27405 131 KP--AFMTGFRGGAVMGMAVVGTSLLGVTLVLLIVGD--A-----SAVLGFSF  
 DSM 5807 128 KP--SFLAGFRGGAVMGMAVVGTSLLGVSLVYATRD--A-----SAMLGFSF  
 ATCC 35319 168 KPLKLLSIPLDSGMSIGVILICVELLMLLILRFVPHELAG-----AAFIQFAI  
 DSM 19732 12 KP--SFMTGFRGGAVMGMAVVGTSLLGVTLVLLIVGD--A-----SAVLGFSF  
 DSM 8532 128 KP--AFLTGFRGGAVMGMAVVGASLLGVSLVLLITGN--A-----SAVLGFSF  
 JCM 21531 1 -----MGMAVVGTSLLGVTLVLLITKD--A-----SSVLGFSF  
 DSM 8691 130 NK--ALQIALRGGAVTGTAVTALSIFGVATLFFAYGG--ASGQOELVKNAPSLIVGGEF

DSM 1313 175 GASSLALFAKAGGIFTKTADISADLVGKVELGIEEDDPRNPAVIADNVGDNVGDVAGMG  
 ATCC 27405 175 GASSLALFAKAGGIFTKTADISADLVGKVELGIEEDDPRNPAVIADNVGDNVGDVAGMG  
 DSM 5807 172 GASSLALFAKAGGIFTKTADISADLVGKVELGIEEDDPRNPAVIADNVGDNVGDVAGMG  
 ATCC 35319 217 GESLGASALRIAGGIFTKTADISGDLM-KIVFKIKEDDPRNPAVIADCTGDNAGDSIGPT  
 DSM 19732 56 GASSLALFAKAGGIFTKTADISADLVGKVELGIEEDDPRNPAVIADNVGDNVGDVAGMG  
 DSM 8532 172 GASSLALFAKAGGIFTKTADISADLVGKVELGIEEDDPRNPAVIADNVGDNVGDVAGMG  
 JCM 21531 32 GASSLALFAKAGGIFTKTADISADLVGKVELGIEEDDPRNPAVIADNVGDNVGDVAGMG  
 DSM 8691 185 GASFVALFAQLGGIITKAADVAGDLVGVKVEAGIPEDDPRNPAVIADLVGDNVGDCAGRG

DSM 1313 235 ADLFDSNVASMAAALV--MATALGGPD-SKNVAMVEAYAAIGLLSSIIGVATARI-----  
 ATCC 27405 235 ADLFDSNVASMAAALV--MATALGGPD-SKNVAMVEAYAAIGLLSSIIGVATARI-----  
 DSM 5807 232 ADLFDSNVASMAAALV--MAITLDKGA-GNFTMMVEVYAAIGLLASSIGVITARM-----  
 ATCC 35319 276 ADGFTTYGVITGVALLTFIVLAVTCKIQ-SDMIWIFETMRILMIVTSTIASFYINKLFSKIR  
 DSM 19732 116 ADLFDSNVASMAAALV--MATSLGGTA-GKNVAMVEAYAAIGLLSSIIGVATARI-----  
 DSM 8532 232 ADLFDSHVASIAAALV--MAASLGG---SNVNMVLCYAAIGLLASSIGVAMARM-----  
 JCM 21531 92 ADLFDSNVASMAAALV--MATALGGIQ-SKNVAMVEAYAAIGLLSSIIGVATARI-----  
 DSM 8691 245 ADLFSTAAENIGAMT--LGVGLYPVFLKGLIFPLVARAIGITASIIIGIVFVNTK----

DSM 1313 287 ---GKNGDPGKALNSSTYVTTAIFAVLT-----ALSTYIFNFE-----WRIWG  
 ATCC 27405 287 ---GKNGDPGKALNSSTYVTTAIFAVLT-----ALSTYIFNFE-----WRIWG  
 DSM 5807 284 ---GKSGDPSNALNSTYVTTALYAGAT-----ALVTWIFKFE-----WRIWG  
 ATCC 35319 335 FADSIINIDFEKPLSSLIWITSFISITAT-----FFASFIMIGPGVTNNESSGGLWVLS  
 DSM 19732 168 ---GEKGDPSKALNSTYVTTAIFAVLT-----ALSTYIFGLE-----WRIWG  
 DSM 8532 281 ---GKNGDPSGALNSTYTTTFVMIILT-----AATAVFNFV-----WRIWF  
 JCM 21531 144 ---GKGDGDPGKALNSSTYVTTAIFAVLT-----ALSTYIFGFE-----WRIWG  
 DSM 8691 299 ---DESKDPMIALNKGYEVTTIINILVLFFAVKVMLSGHLSNGDS-----VNYLLLYG

DSM 1313 327 AT-**AI**GLIVGTIIGITSDYFTNDAKPPVRAVANASK-SGPAFTILSGFSYGLLSALP**SLI**  
 ATCC 27405 327 AT-**AI**GLIVGTIIGITSDYFTNDAKPPVRAVANASK-SGPAFTILSGFSYGLLSALP**SLI**  
 DSM 5807 324 AM-**IAG**LLVGTIIGIASDYFTNDNKKPVHYVAKASE-SGPAFTILSGVSYGFLSVLP**ALA**  
 ATCC 35319 389 VIISCGTLGAAI**PEI**TKIFTSPKSVHV**KET**VTAS**REG**GPSLNILSGIVACNFS**AF**WKG**M**  
 DSM 19732 208 AT-**AI**GLIVGTIIGITSDYFTNDAKPIVQAVANASK-SGPAFTILSGFSYGLISAL**PALI**  
 DSM 8532 321 AC-**I**VGLIVGVIIIGIA**TD**YFTND**TK**NPVRFVAKASK-SGPAFTILSGMSYGVLSIF**PAMV**  
 JCM 21531 184 AT-**AI**GLIVGTIIGITSDYFTNDAKPPVRAVANASK-SGPAFTILSGFSYGLLSAL**PSLI**  
 DSM 8691 349 AA-**VAG**LLISYV**FV**FL**NY**Y**TS**MSTRPVQ**EIA**KAST-TGAATNI**IIT**GT**SV**GMES**PAL**PV**I**

DSM 1313 385 GIAVTALISYYICEPLGS-----GYGMFGISMSA**G**MLSIVGMIISNDAYGPIVDNARG**L**  
 ATCC 27405 385 GIAVTALISYYICEPLGS-----GYGMFGISMSA**G**MLSIVGMIISNDAYGPIVDNARG**L**  
 DSM 5807 382 GIAV**SAL**VAYN**TAQ**LN**EG**--NPVYGMFGISMA**A**GMLSIVGMIISNDAYGPIVDNARG**L**  
 ATCC 35319 449 V**F**IVL**MFC**AYIASR**GL**ADIMSYPS**VFA**FG**LVA**F**CF**LG**MG**PV**TIA**VD**S**YGP**VTD**NA**QSI**  
 DSM 19732 266 GIAV**TSL**AAY**IC**PLGP-----GYGMFGISMSA**G**MLSIVGMIISNDAYGPIVDNARG**L**  
 DSM 8532 379 GIAV**ASL**IAY**KI**SE**PL**GP-----GY**M**FGISMSA**G**MLSIVGMIISNDAYGPIVDNARG**L**  
 JCM 21531 242 GIAVTALISYYICEPLGS-----GYGMFGISMSA**G**MLSIVGMIISNDAYGPIVDNARG**L**  
 DSM 8691 407 F**ISA**AI**IAY**R**GL**AL**EN**--IATAC**FY**GT**AI**AT**MG**LS**TT**AY**I**AM**DT**FG**PI**T**DN**A**GCI**

DSM 1313 440 AEMGGF-----GEKVIAIADELD**SAG**NTVKAVTKGFS**ISA**AGLT**VI**  
 ATCC 27405 440 AEMGGF-----GEKVIAIADELD**SAG**NTVKAVTKGFS**ISA**AGLT**VI**  
 DSM 5807 440 VEMGN-----G**KA**LE**ITD**S**LD**SAGNTVKAVTKG**FAI**GAAGLT**I**  
 ATCC 35319 508 Y**EL**SL**EA**IPDIDSEIEKNFGFKD**DE**E**KAK**Y**LE**AN**DG**AGNT**FKA**T**AK**PV**LI**GT**AV**V**GAT**  
 DSM 19732 321 AEMGGI-----GEKVIAIADELD**SAG**NTVKAVTKGFS**IGA**AGLT**VI**  
 DSM 8532 434 AEMGEI-----G**D**V**ISI**T**TD**S**LD**SAGNTVK**A**TKGFS**IA**AGLT**VI**  
 JCM 21531 297 AEMGGF-----GEKVIAIADELD**SAG**NTVKAVTKGFS**ISA**AGLT**VI**  
 DSM 8691 465 TEMSEA-----P**ES**VRV**VT**D**RL**DACGNT**TKA**TK**GM**AV**GSA**AL**ATF**

DSM 1313 481 SLLGAFMSEVNTAA**SEL**GVQGIANFDIMNPTVFFGLIVGVAIPAVFSAMLM**LV**DKNAQR  
 ATCC 27405 481 SLLGAFMSEVNTAA**SEL**GVQGIANFDIMNPTVFFGLIVGVAIPAVFSAMLM**LV**DKNAQR  
 DSM 5807 481 ALLG**TF**MSEVNTAA**SER**GLAGIENFDI**IN**PTVFFGLIVGVAIPAVFSAMLM**LV**DKNAQR  
 ATCC 35319 568 T**MT**---F**SL**I**LV**IKDTLG**VK**PEE**ILN**LN**PF**T**IL**G**EL**CGGAV**IY**W**FC**AS**ILQ**V**ST**GA**YR**  
 DSM 19732 362 ALLGAFMSEVNTAA**EL**GLE**TS**HF**DI**MNPVFFGLIVGVAIPAVFSAMLM**LV**DKNAQR  
 DSM 8532 475 ALLGAFMSEVNTAA**EL**G**K**T**G**IEG**FDI**IN**PL**VFFGLI**GA**AIP**AF**SAMLM**LV**DKNAQR  
 JCM 21531 338 SLLGAFMSEVNTAA**EL**GI**Q**GI**M**NFDIMNPTVFFGLIVGVAIPAVFSAMLM**LV**DKNAQR  
 DSM 8691 506 L**LF**SA**VI**D**EV**KK**IL**GK**P**DS**W**FA**VD**I**GK**PE**V**F**I**G**A**T**G**AM**IV**Y**FS**TA**IR**AV**GK**AA**QY**

DSM 1313 541 M**VA**E**IHR**--Q**WD**T**IP**GLKEG**KE**NA**K**PDYDKCIDIATTGSLKELIPAGL**MA**IF**ST**IL**VG**F**I**  
 ATCC 27405 541 M**VA**E**IHR**--Q**WD**T**IP**GLKEG**KE**NA**K**PDYDKCIDIATTGSLKELIPAGL**MA**IF**ST**IL**VG**F**I**  
 DSM 5807 541 M**V**E**IHR**--Q**NE**I**P**GLKEG**KE**D**AM**P**Y**DKCIDIATTG**AL**KELIPAGL**MA**IA**ATI**V**GF**V  
 ATCC 35319 625 A**VE**Y**IK**NI**Q**L**DE**DASS**KA**AVE**S**KE**V**V**KI**C**TO**Y**A**Q**GM**V**N**IF**V**AV**FS**FS**LA**FA**FL**S**AP**K  
 DSM 19732 422 M**VE**E**IHR**--Q**W**E**S**I**P**GLKEG**KE**G**V**K**PD**YDKCIDIATTGSLKELIPAGL**TA**IA**ATI**V**GF**F**I**  
 DSM 8532 535 M**VE**E**IHR**--Q**NE**I**E**GLKEG**K**PG**V**K**P**Y**DK**CI**F**IATT**G**A**IRE**LI**PAG**L**MA**IA**ATI**V**GF**F**I**  
 JCM 21531 398 M**VE**E**IHR**--Q**W**D**S**I**P**GLKEG**K**D**NA**K**PD**YDKCIDIATTGSLKELIPAGL**MA**IA**AST**IL**VG**F**I**  
 DSM 8691 565 V**IL**E**V**RR--Q**E**K**EN**P**G**ME**GT**--S**K**PDY**AKT**V**DI**V**TK**GA**L**KE**M**V**IP**GL**IV**V**V**AP**IL**V**GI**T**I**

DSM 1313 599 G**GA**SA**IG**G**FL**---T**GN**IT**S**GL**LL**AL**L**MS**N**AG**GL**W**DN**S**K**KY**VE**AG**NC**GG**K**G**S**TA**H**KA**AV**V**G**  
 ATCC 27405 599 G**GA**SA**IG**G**FL**---T**GN**IT**S**GL**LL**AL**L**MS**N**AG**GL**W**DN**S**K**KY**VE**AG**NC**GG**K**G**S**TA**H**KA**AV**V**G**  
 DSM 5807 599 G**GV**NA**IG**G**FL**---A**GN**IT**S**GL**LL**AL**L**MS**N**S**G**GL**W**DN**AK**KY**VE**AG**NE**GG**K**G**S**NA**H**K**SA**V**V**G  
 ATCC 35319 685 S**GN**ES**V**AL**FV**SY**LV**SI**AV**F**GL**Y**QA**F**FM**AN**AG**GC**WD**NA**KK**V**VE**V**-DL**Q**Q**K**G**T**PL**H**D**A**TV**V**G**  
 DSM 19732 480 G**GV**SA**IG**G**FL**---T**GN**IAS**GL**LL**AL**LMS**N**AG**GL**W**DN**S**K**KY**VE**AG**NC**GG**K**G**S**PA**H**KA**AV**V**G**  
 DSM 8532 593 G**GV**KA**IG**G**FL**---G**GN**IT**S**GL**L**FA**LE**MS**N**S**G**GL**W**DN**AK**KY**VE**AG**NE**GG**K**G**S**DA**H**KA**AV**V**G**  
 JCM 21531 456 G**GV**SA**IG**G**FL**---T**GN**IT**S**GL**LL**AL**L**MS**N**AG**GL**W**DN**S**K**KY**VE**AG**NC**GG**K**G**S**TA**H**KA**AV**V**G**  
 DSM 8691 621 L**G**KE**SA**AA**FL**---M**V**GT**IS**GV**IM**AL**FL**NG**GG**A**W**DN**AK**K**F**IE**L**GN**Y**GG**K**S**DA**H**KA**AV**V**G

DSM 1313 656 DT**VG**DP**FK**DTAGPSINTQIT**V**VS**LV**SS**LL**-----AS**L**FL**N**VL**N**  
 ATCC 27405 656 DT**VG**DP**FK**DTAGPSINTQIT**V**VS**LV**SS**LL**-----AS**L**FL**M**Y**SI**  
 DSM 5807 656 DT**VG**DP**FK**DTAGPSINTQIT**V**VS**LV**SS**LM**-----AT**L**FL**T**IK**I**  
 ATCC 35319 744 DT**VG**DP**FK**DT**SS**V**AN**P**I**IK**FT**T**IF**GL**L**AME**IA**IS**DT**FK**DI**AP**Y**AG**IV**LM**AC**AL**Y**F**V**W**RS**  
 DSM 19732 537 DT**VG**DP**FK**DTAGPSINTQIT**V**VS**LV**AS**LL**-----S**L**FL**L**Y**SI**  
 DSM 8532 650 DT**VG**DP**FK**DTAGPSINTQIT**V**VS**LV**AS**LM**-----S**A**L**FL**T**TS**I  
 JCM 21531 513 DT**VG**DP**FK**DTAGPSINTQIT**V**VS**LV**SS**LL**-----S**S**FL**L**Y**SI**  
 DSM 8691 678 DT**VG**DP**FK**DTAGPS**L**H**V**L**IK**L**IS**T**IT**LV**F**-----AS**L**FR-----



|            |     |   |       |       |       |       |       |       |       |       |       |       |       |       |       |       |
|------------|-----|---|-------|-------|-------|-------|-------|-------|-------|-------|-------|-------|-------|-------|-------|-------|
| DSM 1313   | 694 | F | L     | K     | ---   | K     | R     | N     | G     | F     | A     | L     | I     | S     | V     | A     |
| ATCC 27405 | 694 | F | ----- | ----- | ----- | ----- | ----- | ----- | ----- | ----- | ----- | ----- | ----- | ----- | ----- | ----- |
| DSM 5807   | 694 | F | G     | ----- | ----- | ----- | ----- | ----- | ----- | ----- | ----- | ----- | ----- | ----- | ----- | ----- |
| ATCC 35319 | 804 | F | Y     | K     | M     | R     | V     | N     | K     | E     | N     | ----- | ----- | ----- | ----- | ----- |
| DSM 19732  | 575 | F | ----- | ----- | ----- | ----- | ----- | ----- | ----- | ----- | ----- | ----- | ----- | ----- | ----- | ----- |
| DSM 8532   | 688 | F | ----- | ----- | ----- | ----- | ----- | ----- | ----- | ----- | ----- | ----- | ----- | ----- | ----- | ----- |
| JCM 21531  | 551 | F | ----- | ----- | ----- | ----- | ----- | ----- | ----- | ----- | ----- | ----- | ----- | ----- | ----- | ----- |
| DSM 8691   |     |   | ----- | ----- | ----- | ----- | ----- | ----- | ----- | ----- | ----- | ----- | ----- | ----- | ----- | ----- |

**Figure S1.** Alignment of annotated proton-translocating membrane-associated pyrophosphatase from several thermophilic bacteria species. Bacteria species (and gene number in parentheses) are as follows, from top to bottom: *C. thermocellum* DSM 1313 (*Clo1313\_0823*); *C. thermocellum* ATCC 27405 (*Cthe\_1425*); *C. thermosuccinogenes* DSM 5807 (*CDO33\_RS16605*); *C. cellulolyticum* ATCC 35319 (*Ccel\_2294*); *C. clariflavum* DSM 19732 (*Clocl\_0965*); *C. stercorearium* DSM 8532 (*Cst\_c10040*); *C. straminosolvens* JCM 21531 (*JCM21531\_513*); *T. saccharolyticum* DSM8691 (*Tsac\_2336*). Membrane pyrophosphatases were identified by BLASTp, using the DSM 1313 protein sequence for the gene *Clo1313\_0823* to query the Firmicutes phylum. A similar BLASTp was performed using the *E. coli* cytosolic pyrophosphatase (Ppa) and *B. subtilis* YybQ to determine whether the abovementioned *Clostridia* species also contained either of these enzymes, but no significant hits were found. BLASTp settings can be found in the Materials and Methods. However, in the case of *T. saccharolyticum*, we observed that the protein product of the *T. saccharolyticum* gene *Tsac\_0825* produced a significant alignment to the *B. Subtilis* YybQ protein, suggesting at the possible presence of a Family II PPI-ase in *T. saccharolyticum*, although this is not supported with experimental evidence.

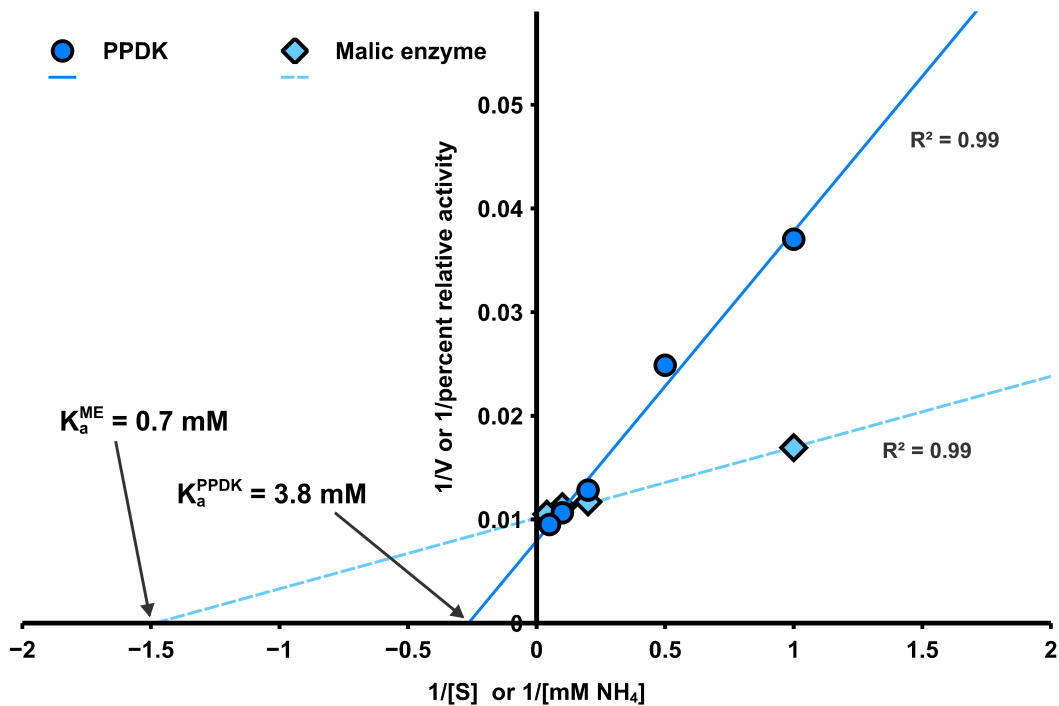

**Figure S2:** Lineweaver-Burk plots for activation of malic enzyme (ME) and pyruvate phosphate dikinase (PPDK) by  $\text{NH}_4^+$ . Data for PPDK from Zhou and for ME from Taillefer et al.

Zhou J. 2016. PhD thesis. Comparative analysis of central metabolism in three thermophilic saccharolytic bacteria. Dartmouth College, Hanover, NH.

Taillefer M, Rydzak T, Levin DB, Oresnik IJ, Sparling R. 2015. Reassessment of the transhydrogenase/malate shunt pathway in *Clostridium thermocellum* ATCC 27405 through kinetic characterization of malic enzyme and malate dehydrogenase. Appl Environ Microbiol 81:2423–2432.
